# Supplementary material for: Genetic Diversity of Cryptosporidium in Children in an Urban Informal Settlement of Nairobi, Kenya
Source: PubMed Central journal article supplement (PMC4687032; doi:10.1371/journal.pone.0142055), 2015-12-21
Supplement: pone.0142055.s002.pdf [file pone.0142055.s002.pdf]

| <b>carenum</b> | <b>Genotype</b> | <b>Subtypefamily</b> | <b>Subtype</b> | <b>HIV</b> |
|----------------|-----------------|----------------------|----------------|------------|
| M0009          | C. hominis      | Ia                   | IaA25R5        | NEGATIVE   |
| M0016          | C. hominis      | Id                   | IdA22          | NEGATIVE   |
| M0044          | C. hominis      | Id                   | 1dA24          | NEGATIVE   |
| M0074          | C. hominis      | Id                   | IdA19          | NEGATIVE   |
| M0082          | C. hominis      | Ib                   | IbA9G3         | NEGATIVE   |
| M0121          | C. hominis      | Id                   | IdA25          | NEGATIVE   |
| M0123          | C. hominis      | Ia                   | IaA27R3        | NEGATIVE   |
| M0142          | C. hominis      | Id                   | IdA22          | NEGATIVE   |
| M0187          | C. hominis      | If                   | IfA19G1        | NEGATIVE   |
| M0194          | C. hominis      | Ie                   | Ie11G3T3R1     | NEGATIVE   |
| M0246          | C. parvum       | IIc                  | IIcA5G3R2      | NEGATIVE   |
| M0256          | C. hominis      | Id                   | IdA21          | NEGATIVE   |
| M0273          | C. hominis      | Ie                   | IeA11G3T3R1    | NEGATIVE   |
| M0278          | C. hominis      | Ie                   | IeA11G3T3R1    | NEGATIVE   |
| M0384          | C. parvum       | IIc                  | IIcA5G3R2      | NEGATIVE   |
| M0466          | C. hominis      | Id                   | IdA20          | NEGATIVE   |
| M0580          | C. hominis      | Id                   | IdA17G1        | POSITIVE   |
| M0602          | C. parvum       | IIc                  | IIcA5G3R2      | POSITIVE   |
| M0679          | C. hominis      | Id                   | IdA22          | NEGATIVE   |
| M0747          | C. parvum       | IIc                  | IIcA5G3R2      | NEGATIVE   |
| M0819          | C. hominis      | Ie                   | IeA11G3T3R1    | NEGATIVE   |
| M0954          | C. hominis      | Id                   | IdA18          | NEGATIVE   |
| M0986          | C. parvum       | IIc                  | IIcA5G3R2      | POSITIVE   |
| M1051          | C. hominis      | Ie                   | Ie11G3T3R1     | NEGATIVE   |
| M1108          | C. hominis      | Ie                   | IeA11G3T3R1    | NEGATIVE   |
| M1136          | C. hominis      | Ib                   | IbA9G3         | POSITIVE   |
| M1213          | C. hominis      | Id                   | IdA22          | POSITIVE   |
| M1227          | C. hominis      | Id                   | IdA25          | NEGATIVE   |
| M1233          | C. hominis      | Ib                   | IbA9G3         | NEGATIVE   |
| M1241          | C. hominis      | Ib                   | IbA9G3         | POSITIVE   |
| M1242          | C. hominis      | Ie                   | IeA11G3T3R1    | POSITIVE   |
| M1265          | C. hominis      | Ib                   | IbA9G3         | POSITIVE   |
| M1327          | C. hominis      | Ie                   | IeA11G3T3R1    | NEGATIVE   |
| M1328          | C. hominis      | Ib                   | IbA9G3         | POSITIVE   |
| M1362          | C. hominis      | Ib                   | IbA9G3         | NEGATIVE   |
| M1399          | C. hominis      | Ib                   | IbA9G3         | NEGATIVE   |
| M1414          | C. hominis      | Ie                   | IeA11G3T3R1    | NEGATIVE   |
| M1425          | C. parvum       | IIc                  | IIcA5G3R2      | POSITIVE   |
| M1448          | C. hominis      | Ie                   | IeA11G3T3      | NEGATIVE   |
| M1454          | C. hominis      | Ib                   | IbA9G3         | NEGATIVE   |
| M1492          | C. hominis      | Ia                   | IaA30R3        | POSITIVE   |
| M1499          | C. hominis      | Ib                   | IbA9G3         | NEGATIVE   |
| M1548          | C. hominis      | Id                   | IdA24          | NEGATIVE   |
| M1570          | C. parvum       | IIc                  | IIcA5G3R2      | NEGATIVE   |
| M1599          | C. hominis      | Ib                   | IbA9G3         | NEGATIVE   |
| M1553          | C. hominis      | Ia                   | IaA7R1         | NEGATIVE   |
| M1567          | C. hominis      | Id                   | IdA22          | NEGATIVE   |
| M1574          | C. hominis      | Id                   | IdA15G1        | NEGATIVE   |
| M1578          | C. hominis      | Ia                   | IaA7R1         | NEGATIVE   |

|       |            |     |             |          |
|-------|------------|-----|-------------|----------|
| M1593 | C. hominis | Ie  | IeA11G3T3R1 | NEGATIVE |
| M1605 | C. hominis | Ib  | IbA9G3      | NEGATIVE |
| MB022 | C. hominis | Ib  | IbA9G3      | NEGATIVE |
| MB026 | C. parvum  | Ilc | IlcA5G3R2   | NEGATIVE |
| MB035 | C. hominis | Id  | IdA23GI     | NEGATIVE |
| MB056 | C. hominis | Ie  | IeA11G3T3R1 | NEGATIVE |
| MB069 | C. parvum  | Ilc | IlcA5G3R2   | NEGATIVE |
| MB084 | C. parvum  | Ilc | IlcA5G3R2   | UNKNOWN  |
| MB086 | C. hominis | If  | IfA14G1     | NEGATIVE |
| MB101 | C. hominis | Ie  | IeA11G3T3R1 | POSITIVE |
| MB107 | C. hominis | Ib  | IbA9G3      | POSITIVE |
| MB110 | C. hominis | Id  | IdA15G1     | POSITIVE |
| MB124 | C. hominis | Id  | IdA22       | POSITIVE |
| MB151 | C. parvum  | Ilc | IlcA5G3R2   | NEGATIVE |
| MB163 | C. parvum  | Ilc | IlcA5G3R2   | POSITIVE |
| MB178 | C. hominis | If  | IfA12G1     | POSITIVE |
| MB181 | C. hominis | Id  | IdA22       | NEGATIVE |
| MB192 | C. hominis | Id  | IdA22       | NEGATIVE |
| MB214 | C. hominis | Ib  | IbA9G3R2    | NEGATIVE |
| MB236 | C. hominis | Ie  | IeA11G3T3R1 | NEGATIVE |
| MB241 | C. hominis | Ib  | IbA9G3      | NEGATIVE |
| MB254 | C. parvum  | Ilc | IlcA5G3R2   | NEGATIVE |
| MB264 | C. hominis | Ie  | IeA11G3T3R1 | POSITIVE |
| MB277 | C. parvum  | Ilc | IlcA5G3R2   | POSITIVE |
| MB321 | C. parvum  | Ilc | IlcA5G3R2   | POSITIVE |
| MB322 | C. hominis | Ie  | IeA11G3T3   | NEGATIVE |
| MB325 | C. hominis | Ib  | IbA9G3      | NEGATIVE |
| MB330 | C. parvum  | Ilc | IlcA5G3R2   | POSITIVE |
| MB337 | C. hominis | Ib  | IbA9G3      | POSITIVE |
| MB338 | C. parvum  | Ilc | IlcA5G3R2   | POSITIVE |
| MB350 | C. hominis | Id  | IdA22       | ND       |
| MB355 | C. hominis | Ie  | IeA11G3T3   | ND       |
| MB359 | C. hominis | Id  | IdA15G1     | POSITIVE |
| MB360 | C. hominis | Id  | IdA25       | POSITIVE |
| MB360 | C. hominis | Id  | IdA25       | POSITIVE |
| MB363 | C. hominis | Ie  | IeA11G3T3R1 | NEGATIVE |
| MB372 | C. hominis | Id  | IdA22       | NEGATIVE |
| MB389 | C. hominis | Ie  | IeA11G3T3R1 | NEGATIVE |
| MB397 | C. hominis | Id  | IdA24       | NEGATIVE |
| MB407 | C. hominis | Ie  | IeA11G3T3R1 | NEGATIVE |
| MB419 | C. hominis | Ib  | IbA9G3R2    | POSITIVE |
| MB428 | C. hominis | Id  | IdA22       | POSITIVE |
| MB435 | C. hominis | Ie  | IeA11G3T3   | POSITIVE |
| MB441 | C. parvum  | Ilc | IlcA5G3R2   | NEGATIVE |
| MB446 | C. hominis | Id  | IdA22       | POSITIVE |
| MB456 | C. hominis | Id  | IdA22       | ND       |
| MB490 | C. hominis | Ib  | IbA9G3R2    | POSITIVE |
| MB493 | C. hominis | Id  | IdA25       | POSITIVE |
| MB494 | C. hominis | Ie  | IeA11G3T3R1 | NEGATIVE |
| MB496 | C. hominis | Ie  | IeA11G3T3R1 | POSITIVE |

|       |            |     |           |          |
|-------|------------|-----|-----------|----------|
| MB501 | C. parvum  | Ilc | IlcA5G3R2 | POSITIVE |
| MB516 | C. hominis | Id  | IdA22     | NEGATIVE |





Inpatient  
Inpatient
