# Supplementary material for: Genetic Diversity of Cryptosporidium in Children in an Urban Informal Settlement of Nairobi, Kenya
Source: PLoS One. 2015 Dec 21;10(12):e0142055. doi: 10.1371/journal.pone.0142055 (PMC4687032; doi:10.1371/journal.pone.0142055)
Supplement: S1 Fig — (PDF) [file pone.0142055.s001.pdf]

|         | 1                                                               | 10 | 20 | 30 | 40 | 50 | 60 |
|---------|-----------------------------------------------------------------|----|----|----|----|----|----|
| Gp60-Id | TGAAGGATGTTTCTGTTGAGGGCTCATCATCATCATCATCATCATCATCATCATCAT       |    |    |    |    |    |    |
| MB110   | -----                                                           |    |    |    |    |    |    |
| M580    | -----                                                           |    |    |    |    |    |    |
| MB035   | -----ACCTAGGGTTGGTCCTTGTTTCAGCTAAGTCTCCGTTCTCATTACAAC           |    |    |    |    |    |    |
| MB124   | -----AAGTCTCCGTTCTCATT-CAAC                                     |    |    |    |    |    |    |
| Gp60-Id | CATCATCATCATCATCAACGACCGTCGCACCAGCTTCAAATAAGGCAAGA-ACTGGAGAG    |    |    |    |    |    |    |
| MB110   | -----                                                           |    |    |    |    |    |    |
| M580    | -----CATCAACGGCCGTTGCACCAGCTTCAAAAAAGGCAAGAGACTGGAGAG           |    |    |    |    |    |    |
| MB035   | TTGTAGACACCATCGGTGCTGCCGCTATTTTTGCCGGTATAGAAAGCACT-ATCGTCTGC    |    |    |    |    |    |    |
| MB124   | TTGTAGACACCATCGGTGCTGCCGCTATTTTTGCCGGTATAGAAAGCACT-ATCGTCTGC    |    |    |    |    |    |    |
| Gp60-Id | GACACAGGACGAAGCGAAGGAAGTCAAGGTTCTGAAGAACACCAAGACGGAGAGGACGAT    |    |    |    |    |    |    |
| MB110   | -----                                                           |    |    |    |    |    |    |
| M580    | GACACAGGACGAAGCGAAGGAAGTCAAGGTTTTGAAGAACACCAAGACGGAGAGGACGAT    |    |    |    |    |    |    |
| MB035   | AACCAAACTGTACTTGTCTCTTTTCGATGTTTCTTCGGCGTTTGGCACAGCCACTTCAAT    |    |    |    |    |    |    |
| MB124   | AACCAAACTGTACTTGTCTCTTTTCGATGTTTCTTCGGCGTTTGGCACAGCCACTTCAAT    |    |    |    |    |    |    |
| Gp60-Id | AGTTCAGATTCTAGTGGAGGCAGTGTAGGAGGCACAGAGAGCGGAAGTGCAGGAGGAAAG    |    |    |    |    |    |    |
| MB110   | -----                                                           |    |    |    |    |    |    |
| M580    | AGTTCAGATTCTAGTGGAGGCAGTGTAGGAGGCACAGAGAGCGGAAGTGCAGGAGGAAAG    |    |    |    |    |    |    |
| MB035   | TCTCTTACCACCATTAAGGGTAAAGGCAAACAAATCGACGGTTGCAGTTTCACTAGTTTC    |    |    |    |    |    |    |
| MB124   | TCTCTTACCACCATTAAGGGTAAAGGCAAACAAATCGACGGTTGCAGTTTCACTAGTTTC    |    |    |    |    |    |    |
| Gp60-Id | AACGAAGAAGATAGTTCAAGTTCGGAGGTGCTCAGGACGGCAGTGGAGGCACTGCAGAA     |    |    |    |    |    |    |
| MB110   | -----TCAGGACGGCAGTGGAGGCACTGCAGAA                               |    |    |    |    |    |    |
| M580    | AACGAAGAAGATAGTTCAAGTTCGGAGGTGCTCAGGACGGCAGTGGAGGCACTGCAGAA     |    |    |    |    |    |    |
| MB035   | CTCTGTGAGTGATCTTCTTGATCTTGACTCAACCTGATTGCCAGACTCACCTTTATTTTC    |    |    |    |    |    |    |
| MB124   | CTCTGTGAGTGATCTTCTTGATCTTGACTCAACATGATGGCCAGAATCACCTCTATTATC    |    |    |    |    |    |    |
| Gp60-Id | GG-CG--CTACTCAGTCCGAGGCTACTGCTTCTCAAGGTGCTCCATCTCAAGGTTCTGAC    |    |    |    |    |    |    |
| MB110   | GGGCG--CTAATCAGTCCGAGGGTACTGCTTCTCAAGGTGCTCCATCTCAAGGTTCTGAC    |    |    |    |    |    |    |
| M580    | GG-CG--CTACTCAGTCCGAGGCTACTGCTTCTCAAGGTGCTCCATCTCAAGGTTCTGAC    |    |    |    |    |    |    |
| MB035   | GGTTGGACTACTTGAGCT-AGCAGAGAGAGTGCTGAAATCCTGACCGTCAA--CCTTGAT    |    |    |    |    |    |    |
| MB124   | GGTTGGACTACTTGAGCT-AGCAGAGAGAGTGATGAAATCCTGACCGTCAA--CCTCGAT    |    |    |    |    |    |    |
| Gp60-Id | AAAAC TACCGAGTCCACACAAACTACTCCAAAGGAAGAGTGCGGTACTTTCGTTTGTAAATG |    |    |    |    |    |    |
| MB110   | AAAAC TACCGAGTCCACACAAACTACTCCAAAGGAAGAGTGCGGTACTTTCGTTTGTAAATG |    |    |    |    |    |    |
| M580    | AAAAC TACCGAGTCCACACAAACTACTCCAAAGGAAGAGTGCGGTACTTTCGTTTGTAAATG |    |    |    |    |    |    |
| MB035   | TTTA--ATTGTATTATCACTTTCTTTTGGAAAGGATACATTCTTTACTTCACCAGAGATA    |    |    |    |    |    |    |
| MB124   | GTTA--ATTGTATTATCACTTTCTTTTGGAAAGGAGACATTCTTTACTTCACCAGAGATA    |    |    |    |    |    |    |
| Gp60-Id | TGGTTCGGTGAAGGTACCCCGGTTGCGACCTTGAAGTGTGGTGGTTACACTATCGTCTAT    |    |    |    |    |    |    |
| MB110   | TGGTTCGGTGAAGGTACCCCGGTTGCGACCTTGAAGTGTGGTGGTTACACTATCGTCTAT    |    |    |    |    |    |    |
| M580    | TGGTTCGGTGAAGGTACCCCGGTTGCGACCTTGAAGTGTGGTGGTTACACTATCGTCTAT    |    |    |    |    |    |    |
| MB035   | TATCTTGGTGCGGG-ATTTGCTTGATCCTTTTACAGGTGCATAGACGATAGTGTAAACCACC  |    |    |    |    |    |    |
| MB124   | TATCATGGTGCGGG-AGGTGCTTGATCCTTTTACAGGTGCATAGACGATAGTGTAAACCACC  |    |    |    |    |    |    |
| Gp60-Id | GCACCTGTAAAGGATCAAGCAAAT-CCCGCACCAAGATATATCTCTGGTGAAGTAAAGAA    |    |    |    |    |    |    |
| MB110   | GCACCTGTAAAGGATCAAGCAAAT-CCCGCACCAAGATATATCTCTGGTGAAGTAAAGAA    |    |    |    |    |    |    |
| M580    | GCACCTGTAAAGGATCAAGCAAAT-CCCGCACCAAGATATATCTCTGGTGAAGTAAAGAA    |    |    |    |    |    |    |
| MB035   | ACACTTCAAGGTTCGCAACCGGGTACC'TTACC GAACCACATTACAAACGAAGTACCGCA   |    |    |    |    |    |    |
| MB124   | ACACCTCAAGGTTCGCAACCGGGTACC'TTACC GAACCACATTACAAACGAAGTACCGCA   |    |    |    |    |    |    |
| Gp60-Id | TGTATCCTTCCAAAAAGAAAGTGATAATACAAT--TAAAATCAAGGTTGACGGTCAGGAT    |    |    |    |    |    |    |
| MB110   | TGTATCCTTCCAAAAAGAAAGTGATAATACAAT--TAAAATCAAGGTTGACGGTCAGGAT    |    |    |    |    |    |    |
| M580    | TGTATCCTTCCAAAAAGAAAGTGATAATACAAT--TAAAATCAAGGTTGACGGTCAGGAT    |    |    |    |    |    |    |
| MB035   | CTCTTCCTTTGGAGTAGTTTGTGTGGACTCGGTAGTTTTGTGAGAACCTTGAGATGGAGC    |    |    |    |    |    |    |

Supplementary material 1: Alignment showing difference in isolates.

|         |                                                              |
|---------|--------------------------------------------------------------|
| Gp60-Id | TTCAGCACTCTCTCTGCTAGCTCAAGTAGTCCAACCGAAAATAAAGGTGAGTCTGGCAAT |
| MB110   | TTCAGCACTCTCTCTGCTAGCTCAAGTAGTCCAACCGAAAATAAAGGTGAGTCTGGCAAT |
